# Supplementary material for: Human immunodeficiency virus Tat associates with a specific set of cellular RNAs
Source: PubMed Central journal article supplement (PMC4086691; doi:10.1186/1742-4690-11-53), 2014-07-03

**A**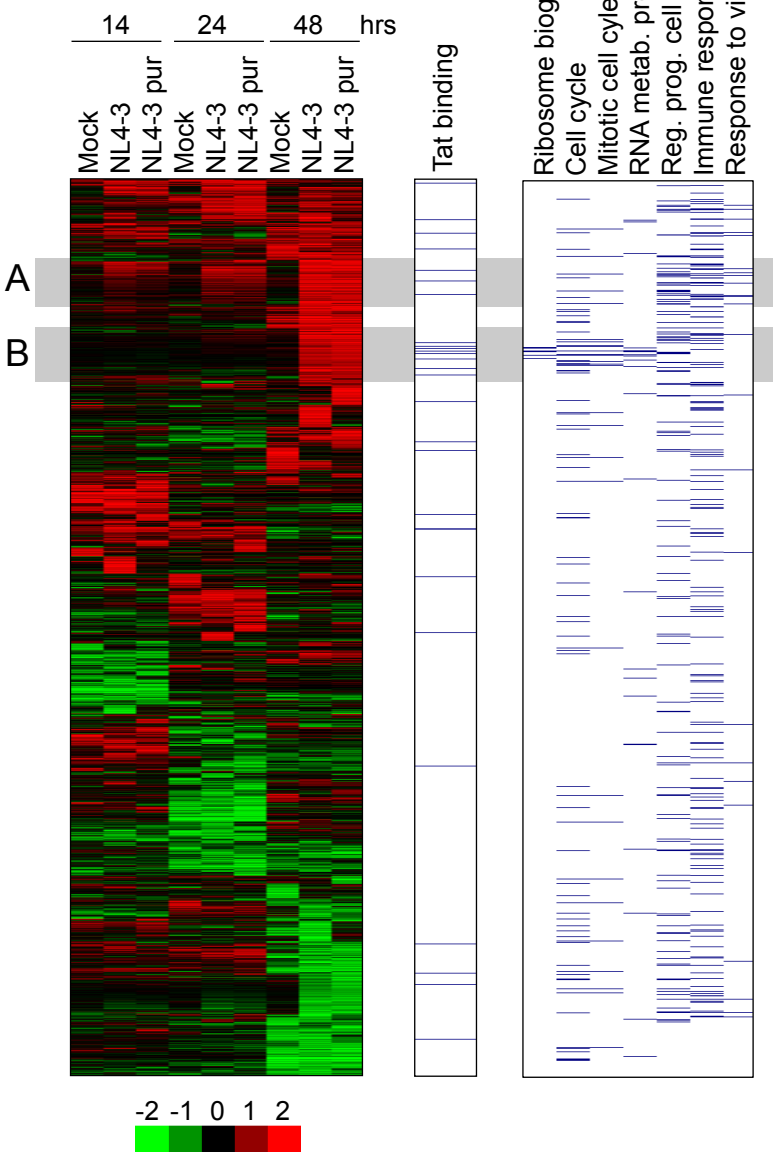**B**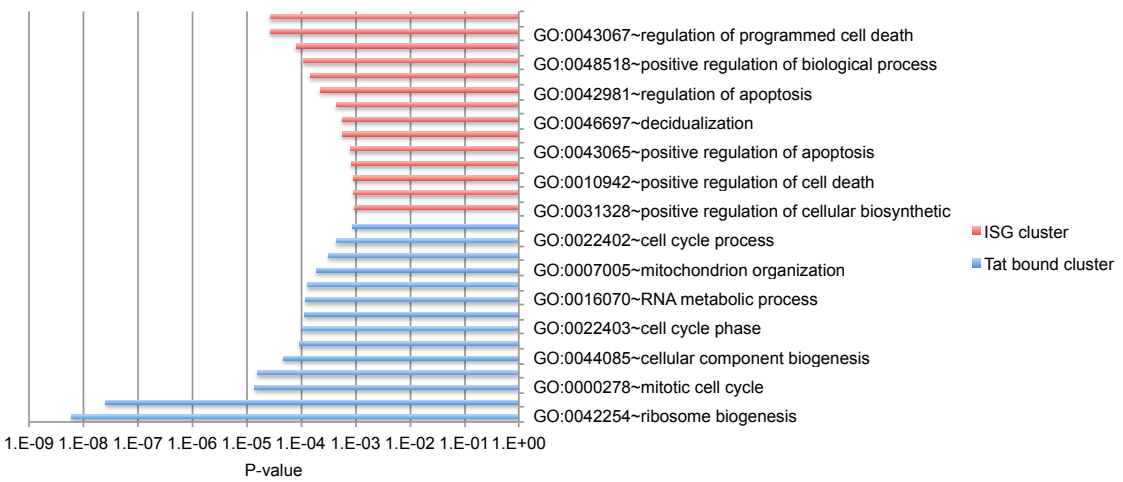

Supplement: 1742-4690-11-53-S5.pdf [file 1742-4690-11-53-S5.pdf]
