# Supplementary material for: Human immunodeficiency virus Tat associates with a specific set of cellular RNAs
Source: Retrovirology. 2014 Jul 3;11:53. doi: 10.1186/1742-4690-11-53 (PMC4086691; doi:10.1186/1742-4690-11-53)
Supplement: Additional file 3 — Location of sequence motifs enriched in Tat-bound mRNAs. MAST was used to identify the position of sequences matching each of the motifs (Figure 5). Each of the mRNAs shown has an E-value less than 0.001. The motif matches shown have a position p-value less than 0.01. Motif 3 was removed by MAST because it had a similarity greater than 0.60 with another motif (Motifs 0 and 2). [file 1742-4690-11-53-S3.pdf]

| Sequence                                | E-value |   | Motif 0 | Motif 1 | Motif 2 |
|-----------------------------------------|---------|---|---------|---------|---------|
| Icd NM_203500.1_cdsid_NP_987096.1       | 1e-07   | + |         |         |         |
| Icd NM_014053.3_cdsid_NP_054772.1       | 4.1e-06 | + |         |         |         |
| Icd NM_014015.3_cdsid_NP_054734.2       | 4.5e-06 | + |         |         |         |
| Icd NM_002691.3_cdsid_NP_002682.2       | 4.5e-06 | + |         |         |         |
| Icd NM_001008697.1_cdsid_NP_001008697.1 | 1.4e-05 | + |         |         |         |
| Icd NM_006753.5_cdsid_NP_006744.2       | 1.8e-05 | + |         |         |         |
| Icd NM_014608.3_cdsid_NP_055423.1       | 1.9e-05 | + |         |         |         |
| Icd NM_013282.4_cdsid_NP_037414.3       | 2.3e-05 | + |         |         |         |
| Icd NM_001671.4_cdsid_NP_001662.1       | 3.4e-05 | + |         |         |         |
| Icd NM_000455.4_cdsid_NP_000446.1       | 3.6e-05 | + |         |         |         |
| Icd NM_006821.5_cdsid_NP_006812.3       | 3.7e-05 | + |         |         |         |
| Icd NM_014262.4_cdsid_NP_055077.2       | 4.8e-05 | + |         |         |         |
| Icd NM_014909.4_cdsid_NP_055724.1       | 5.5e-05 | + |         |         |         |
| Icd NM_021174.5_cdsid_NP_066997.3       | 5.7e-05 | + |         |         |         |
| Icd NM_001243.4_cdsid_NP_001234.3       | 6.2e-05 | + |         |         |         |
| Icd NM_020435.3_cdsid_NP_065168.2       | 8.4e-05 | + |         |         |         |
| Icd NM_005346.4_cdsid_NP_005337.2       | 0.00012 | + |         |         |         |
| Icd NM_144653.4_cdsid_NP_653254.1       | 0.00013 | + |         |         |         |
| Icd NM_025268.2_cdsid_NP_079544.1       | 0.00014 | + |         |         |         |
| Icd NM_025078.4_cdsid_NP_079354.2       | 0.00014 | + |         |         |         |
| Icd NM_006516.2_cdsid_NP_006507.2       | 0.00015 | + |         |         |         |
| Icd NM_002918.4_cdsid_NP_002909.4       | 0.00017 | + |         |         |         |
| Icd NM_015833.3_cdsid_NP_056648.1       | 0.00018 | + |         |         |         |
| Icd NM_003278.2_cdsid_NP_003269.2       | 0.0002  | + |         |         |         |
| Icd NM_003885.2_cdsid_NP_003876.1       | 0.00022 | + |         |         |         |
| Icd NM_002840.3_cdsid_NP_002831.2       | 0.00023 | + |         |         |         |
| Icd NM_006927.3_cdsid_NP_008858.1       | 0.00027 | + |         |         |         |
| Icd NM_024632.5_cdsid_NP_078908.1       | 0.0003  | + |         |         |         |
| Icd NM_005049.2_cdsid_NP_005040.2       | 0.00054 | + |         |         |         |
| Icd NM_001466.3_cdsid_NP_001457.1       | 0.00054 | + |         |         |         |
| Icd NM_032164.2_cdsid_NP_115540.2       | 0.00067 | + |         |         |         |
| Icd NM_015523.3_cdsid_NP_056338.2       | 0.00068 | + |         |         |         |
| Icd NM_003501.2_cdsid_NP_003492.2       | 0.00072 | + |         |         |         |
| Icd NM_003371.3_cdsid_NP_003362.2       | 0.00073 | + |         |         |         |
| Icd NM_022120.1_cdsid_NP_071403.1       | 0.0009  | + |         |         |         |
| Icd NM_018166.1_cdsid_NP_060636.1       | 0.00091 | + |         |         |         |
| Icd NM_006320.4_cdsid_NP_006311.2       | 0.00091 | + |         |         |         |
| Icd NM_000189.4_cdsid_NP_000180.2       | 0.00094 | + |         |         |         |
| Icd NM_001436.3_cdsid_NP_001427.2       | 0.00094 | + |         |         |         |
| Icd NM_005453.4_cdsid_NP_005444.4       | 0.00096 | + |         |         |         |
| Icd NM_015721.2_cdsid_NP_056536.2       | 0.00098 | + |         |         |         |
| Icd NM_002969.3_cdsid_NP_002960.2       | 0.00099 | + |         |         |         |
